# Supplementary material for: Content Analysis of Multi-Annual Time Series of Flood-Related Twitter (X) Data
Source: Copernicus journal article supplement (doi:10.5194/egusphere-2024-2556), 2024-08-30
Supplement: Supplementary file 1 [file egusphere-2024-2556-supplement.pdf]

# Supportign Information for *Content Analysis of Multi-Annual Time Series of Flood-Related Twitter (X) Data*

Nadja Veigel<sup>1,2,3</sup>, Heidi Kreibich<sup>2</sup>, Jens de Bruijn<sup>4,5</sup>, Jeroen C.J.H. Aerts<sup>5,6</sup>, and Andrea Cominola<sup>1,3</sup>

<sup>1</sup>Chair of Smart Water Networks, Technische Universität Berlin, Straße des 17. Juni 135, Berlin, 10623, Germany

<sup>2</sup>Section 4.4 Hydrology, GFZ German Research Centre for Geosciences, Telegrafenberg, Potsdam, 14473, Germany

<sup>3</sup>Einstein Center Digital Future, Robert-Koch-Forum Wilhelmstraße 67, Berlin, 10117, Germany

<sup>4</sup>International Institute for Applied Systems Analysis (IIASA), Laxenburg, Austria

<sup>5</sup>Institute for Environmental Studies, VU University, Amsterdam, the Netherlands

<sup>6</sup>Deltares Institute, Delft, the Netherlands

**Correspondence:** Nadja Veigel (nadja.veigel@tu-berlin.de)

## Contents

|    |                                                                                                            |          |
|----|------------------------------------------------------------------------------------------------------------|----------|
|    | <b>1 Supporting Information</b>                                                                            | <b>1</b> |
|    | 1.1 Software . . . . .                                                                                     | 1        |
|    | 1.2 Supporting Information on Method Development and Data . . . . .                                        | 2        |
| 5  | 1.2.1 Data cleaning . . . . .                                                                              | 2        |
|    | 1.2.2 Hyperparameter Tuning . . . . .                                                                      | 2        |
|    | 1.2.3 Twitter (X) Users . . . . .                                                                          | 3        |
|    | <b>2 Figures</b>                                                                                           | <b>4</b> |
|    | <b>3 Tables</b>                                                                                            | <b>7</b> |
| 10 | <b>1 Supporting Information</b>                                                                            |          |
|    | <b>1.1 Software</b>                                                                                        |          |
|    | – Research Software in this study was developed using Python (version 3.8) and R (version 4.2.3) language. |          |
|    | – Experimental Setup:                                                                                      |          |
|    | RAM: 256 GB                                                                                                |          |
| 15 | CPU: 2 x 16-Core Epyc 7313                                                                                 |          |

- Bidirectional Encoder Representations from Transformers are developed based on Reimers and Gurevych (2019). We develop UMAP dimensionality reduction based on McInnes et al. (2017). To implement Unsupervised clustering HDBSCAN we rely on McInnes et al. (2018). The BERTopic library Grootendorst (2022) facilitated the BERTopic integration, accessible at <https://maartengr.github.io/BERTopic>. The scripts used for the analysis are available at: [https://github.com/SWN-group-at-TU-Berlin/SocialMediaNLP\\_FloodTopics](https://github.com/SWN-group-at-TU-Berlin/SocialMediaNLP_FloodTopics).
- Tweet location identification is based on an algorithm developed by de Bruijn et al. (2017). The dataset of flood related Twitter posts from de Bruijn et al. (2019). The Data is available at <https://www.globalfloodmonitor.org/> upon request.

## 1.2 Supporting Information on Method Development and Data

### 1.2.1 Data cleaning

- 25 The tweets containing the following strings were removed prior to modelling, because they indicated that the tweets are not flood related: *\*flüchtl \* -refugee, \*asyl \* -, \*asyl, \*migran \* -migration, \*ezb - geldflut \* -ezbmoneyflood, \*fachkräfte - flut \* - flood of skilled workers, \*app - flut \* - app flood, \*pegida \* - pegida, \*islam \* - islam, \*nazi \* - nazi, \*#nowplaying \* - #nowplaying, \*#sex \* - sex, \*#arsch \* - ass, \*#obamacare \* - #obamacare*

### 1.2.2 Hyperparameter Tuning

- 30 The HDBSCAN clustering results varies with different hyperparameter settings. We iteratively changed the hyperparameters, since our unsupervised approach does not allow for automatic hyperparameter optimization. Limiting the number of clusters to a small number causes many different tweets to be aggregated in one big cluster, even though their topics are very diverse. This will result in fuzzy clusters. Too many topics however, will result in topics that revolve around very specific themes that have little relevance in a broader context. Here we allow for very cluster sizes of minimum 20 tweets to capture a wide range
- 35 of themes. Additional hyperparameter settings are listed below:

- min\_samples = None
- cluster\_selection\_epsilon = 0.0
- max\_cluster\_size = 20
- metric = 'euclidean'
- 40 – alpha = 1.0
- p = None
- algorithm = 'best'
- leaf\_size = 40

- memory = Memory(location = None)
- 45 - approx\_min\_span\_tree = True
- gen\_min\_span\_tree = False
- core\_dist\_n\_jobs = 4
- cluster\_selection\_method = 'eom'
- allow\_single\_cluster = False
- 50 - prediction\_data = False
- match\_reference\_implementation = False

### 1.2.3 Twitter (X) Users

Among the organizational users, *@hochwasserportal\_de*, an account associated with a portal providing information or updates related to floods or high-water events, has the highest frequency of posting with 2344 tweets throughout the entire time series.

- 55 There were four other regionally focused analogous accounts that posted moderately between 300-400 tweets. Although not being substantial considering the total number of tweets, this shows a discrepancy in posting activity among these entities and private individuals during the observed period. The tweets from these organizations were semantically very similar and therefore they were successfully separated from the tweets of private users with BERTopic.

## 2 Figures

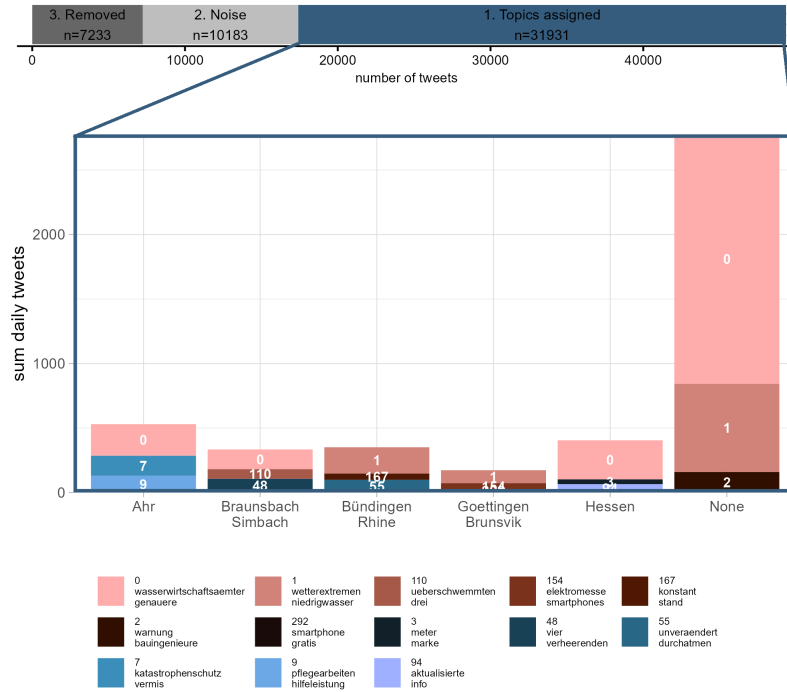

**Figure S1.** Stacked bar chart showing the three topics representing the highest daily sum of tweets during the event periods. The top chart represents tweets removed by the manual (“Removed”) and automatic (“Noise”) filtering.

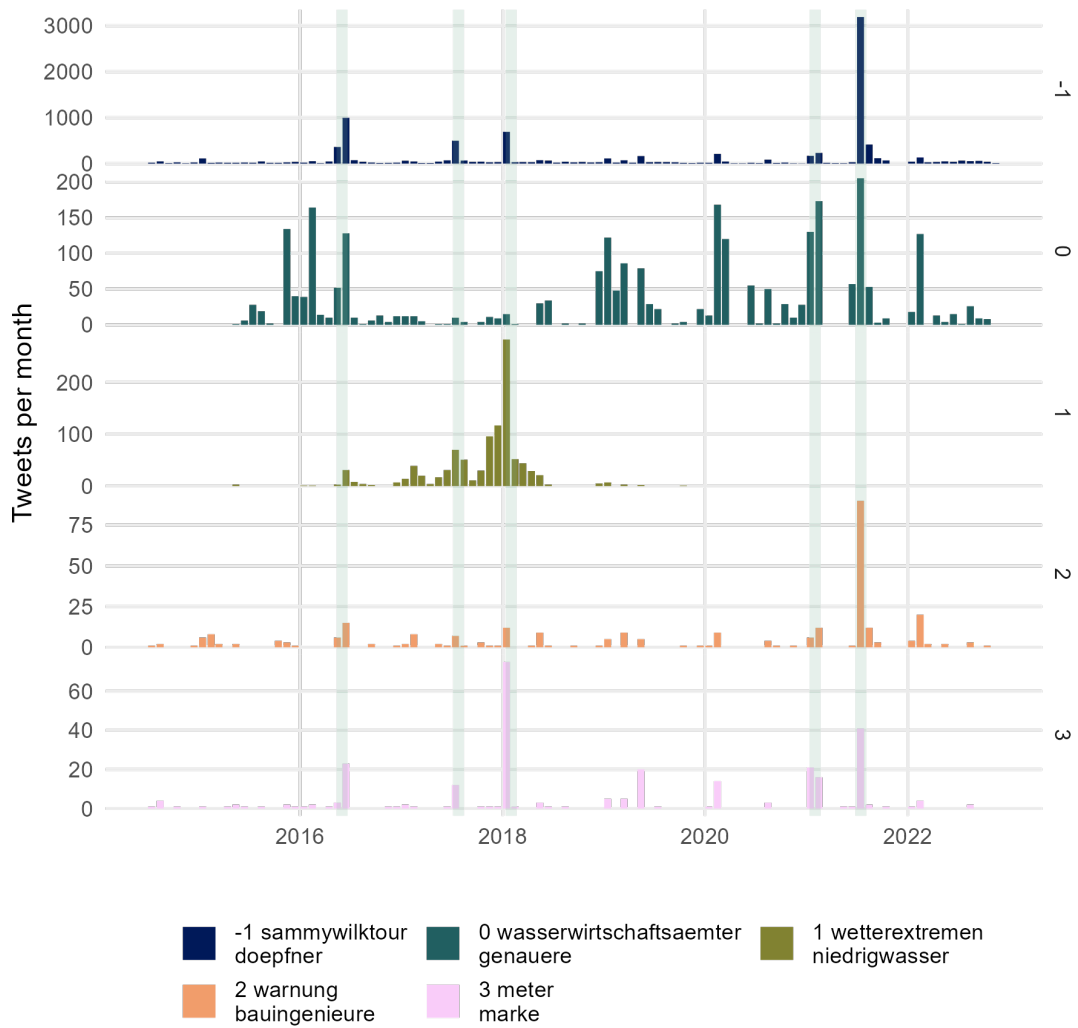

**Figure S2.** Occurrence of tweets related to the noise topic (top panel, excluded from further analysis) and development of monthly tweets for the four topics with the most occurring instances over the whole time period.

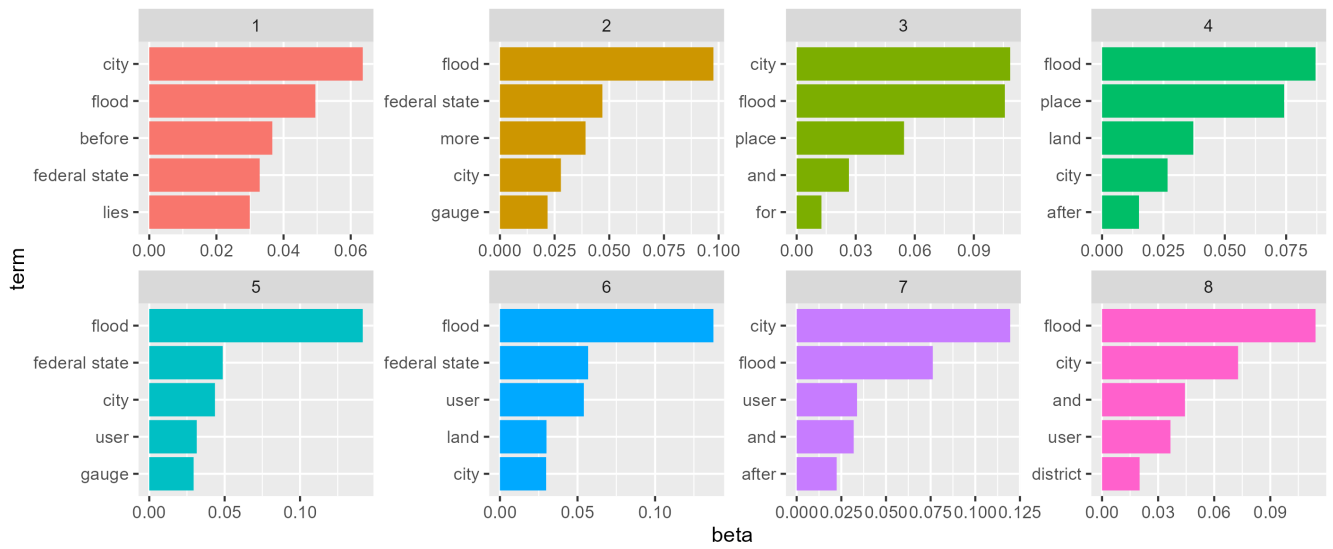

**Figure S3.** Top terms for 8 LDA topics and beta values.

Table S1: Topic descriptions for all topics represented in Figure 1 in the main manuscript

| Topic | Group                                                                                                                      | Top_n_words                                                                                                                                          | freq | representative text                                                                                                                                    |
|-------|----------------------------------------------------------------------------------------------------------------------------|------------------------------------------------------------------------------------------------------------------------------------------------------|------|--------------------------------------------------------------------------------------------------------------------------------------------------------|
| 0     | Signal and detect disasters                                                                                                | wasserwirtschaftsaemter - genauere - unteren - mittlerweile - bayerische - informationen - bundesland - sinken - schlimmer - bilanz                  | 2653 | pegel bundesland aktuelle hochwasser info liegt vor mehr unter                                                                                         |
| 1     | Signal and detect disasters                                                                                                | wetterextremen - niedrigwasser - besser - betroffen - thema - neue - infos - starkregen - heute - hochwasser                                         | 1010 | pegel bundesland aktuelle hochwasser info liegt vor mehr unter                                                                                         |
| 3     | Provide and receive disaster warnings                                                                                      | meter - marke - normalerweise - zurueckgeht - stunde - zentimeter - tauwetter - geregnet - acht - regnet                                             | 286  | der hochwasser scheidelpunkt scheint erreicht der koelner pegel stagniert nach meter in stadt wurden meter erreicht noch heute sollen die pegel sinken |
| 7     | Discuss socio-political and scientific causes and implications of and responsibility for events                            | katastrophenschutz - vermis - reserve - blackouts - verbesserungsbedarf - provinzial - bahnfamilie - krisenvorsorge - tankstel - wetterkatastrophe   | 252  | katastrophenschutz vor monaten probte land den ernstfall und scheiterte hochwasser                                                                     |
| 24    | Discuss socio-political and scientific causes and implications of and responsibility for events                            | bundeskanzlerin - angela - unbuerokratische - tausend - merkelmussweg - apokalypseundfilterkaffee - verzweifelten - invasionen - schweigt - headline | 147  | neuer beitrag nach hochwasser merkel in stadt tagesschau                                                                                               |
| 48    | Inform others about ones own condition and location and learn about a disaster-affected individuals condition and location | vier - verheerenden - zerstoerungen - staudamm - erschossen - gekommen - regionalnachrichten - starben - android - telmi                             | 110  | vier tote bei hochwasser katastrophe in bundesland                                                                                                     |
| 55    | Provide and receive disaster preparedness information                                                                      | unveraendert - durchatmen - hoellentalkamm - nosferatu - totkriegen - leuchtet - bangen - vermisste - stadt - hochwasser                             | 102  | der rhein pegel in stadt steht um unveraendert bei zentimetern hochwasser                                                                              |
| 69    | Signal and detect disasters                                                                                                | konstant - stand - gt - cm - rhein - min - pegel - benutzer - stadt - hochwasser                                                                     | 92   | hochwasser stadt benutzer rhein gt pegel cm seit h konstant stand                                                                                      |

|     |                                                                                                                            |                                                                                                                                                                    |    |                                                                                                     |
|-----|----------------------------------------------------------------------------------------------------------------------------|--------------------------------------------------------------------------------------------------------------------------------------------------------------------|----|-----------------------------------------------------------------------------------------------------|
| 110 | Document and learn what is happening in the disaster Event                                                                 | ueberschwemmten - drei - sommergewittern - break - spiegelonline - nationalekatastrophe - gerrithiemstra - panorama - gefunden - verheerenden                      | 76 | drei tote bei hochwasser in bezirk                                                                  |
| 114 | Inform others about ones own condition and location and learn about a disaster-affected individuals condition and location | jahrhundert - kraftwerke - informationen - steigt - todeszahlen - thailandtip - abends - rwe - ministerpraesidentin - verletzt                                     | 75 | hochwasser zahl der toten steigt auf opfer im raum stadt                                            |
| 122 | Raise and develop awareness of an event; donate and receive donations; identify and list ways to help or volunteer         | betroffene - finanzminister - euro - bankengruppe - spendenstream - ausbezahlt - deutschenstaat - psd - fraktionschef - finanzhilfe                                | 73 | soeder kuendigt euro soforthilfe fuer hochwasser betroffene an bundesland zahlt den betroffenen der |
| 152 | Document and learn what is happening in the disaster Event                                                                 | dammwachen - villafohrde - desserts - entspannte - twitterlaufgruppe - ashura - fieroovend - sonnentag - shoobamusic - wegenmorgen                                 | 64 | hochwasser in land die nacht verlief ruhig hochwasser in bundesland entspannt sich etwas            |
| 154 | Provide and receive disaster warnings                                                                                      | elektromesse - smartphones - wenigen - verteidigungsministerium - katastrophenalarm - vorsorgestrategie - evakuierungsmaßnahmen - kreiszeitung - breaking - warten | 64 | hochwasser landkreis ruft katastrophenalarm aus                                                     |
| 167 | Signal and detect disasters                                                                                                | konstant - stand - gt - cm - min - rhein - pegel - benutzer - stadt - hochwasser                                                                                   | 61 | hochwasser stadt benutzer rhein gt pegel cm seit h konstant stand                                   |
| 178 | Document and learn what is happening in the disaster Event                                                                 | langsam - fallenden - glueck gehabt - jahresauftakt - krabbenbroetchen - ortinsatzkraefte - wellblech - schiffmann - sandstrand - flussgebiet                      | 58 | hochwasser in bundesland pegelstaende sinken nur langsam                                            |



Table S2: Topic descriptions for all topics represented in Figure 2 in the main manuscript

| Topic | group                                                                                                                      | Top_n_words                                                                                                                                                        | freq | Document                                                                                               |
|-------|----------------------------------------------------------------------------------------------------------------------------|--------------------------------------------------------------------------------------------------------------------------------------------------------------------|------|--------------------------------------------------------------------------------------------------------|
| 168   | Document and learn what is happening in the disaster Event                                                                 | niederbayerischen - todesopfern - katas-trophalem - onlinewetter - dpa - gmx - ver-heerenden - perso - gekostet - atempause                                        | 61   | schwere unwetter mindestens vier tote bei hochwasser in bezirk                                         |
| 167   | Signal and detect disasters                                                                                                | konstant - stand - gt - cm - min - rhein - pegel - benutzer - stadt - hochwasser                                                                                   | 61   | hochwasser stadt benutzer rhein gt pegel cm seit h konstant stand                                      |
| 110   | Document and learn what is happening in the disaster Event                                                                 | ueberschwemmten - drei - sommerge-wittern - break - spiegelonline - na-tionalekatastrophe - gerrithiemstra - panorama - gefunden - verheerenden                    | 76   | drei tote bei hochwasser in bezirk                                                                     |
| 94    | Signal and detect disasters                                                                                                | aktualisierte - info - liegt - mehr - pegel - bundesland - hochwasser - - -                                                                                        | 79   | pegel bundesland aktualisierte hochwasser info liegt vor mehr unter                                    |
| 76    | Discuss socio-political and scientific causes and implications of and responsibility for events                            | ortufern - schneesmelze - ungerecht - festgefroren - crashes - gluehwein - dauerfrost - skifahrer - sibirischen - dachgeschosswohnung                              | 86   | nach viel schnee zuvor bescherte hochwasser den freiwilligen feuer-wehren stadt und stadt am letzten w |
| 55    | Provide and receive disaster preparedness information                                                                      | unveraendert - durchatmen - hoellentalk-lamm - nosferatu - totkriegen - leuchtet - bangen - vermisste - stadt - hochwasser                                         | 102  | der rhein pegel in stadt steht um unveraendert bei zentimetern hochwasser                              |
| 48    | Inform others about ones own condition and location and learn about a disaster-affected individuals condition and location | vier - verheerenden - zerstoerungen - stau-damm - erschossen - gekomme - regional-nachrichten - starben - android - telmi                                          | 110  | vier tote bei hochwasser katastro-phe in bundesland                                                    |
| 12    | Deliver and consume news coverage of the disaster Event                                                                    | nachrichtenagentur - tennessee - hashtag - satellitenbilder - parteivorsitzende - muse-umsperspektive - altenburger - floodmaps - bildern - newsdestages           | 186  | hat eine headline geaendert hochwasser in land steinmeier besucht                                      |
| 9     | Send and receive requests for help or assistance                                                                           | pflegearbeiten - hilfeleistung - pizzakar-ton - obdachlosen - kriesengebiet - ob-dachloser - khuddam - abschlussmeldung - hilfeleistungskontingent - hilfsangebote | 216  | betrifft kreis stadt gezielte hilf-sangebote werden unter benutzer stadt de gesammelt und koo          |

|   |                                                                                                 |                                                                                                                                                    |      |                                                                                    |
|---|-------------------------------------------------------------------------------------------------|----------------------------------------------------------------------------------------------------------------------------------------------------|------|------------------------------------------------------------------------------------|
| 7 | Discuss socio-political and scientific causes and implications of and responsibility for events | katastrophenschutz - vermis - reserve - blackouts - verbesserungsbedarf - provinzial - bahnfamilie - krisenvorsorge - tankstel - wetterkatastrophe | 252  | katastrophenschutz vor monaten probte land den ernstfall und scheiterte hochwasser |
| 0 | Signal and detect disasters                                                                     | wasserwirtschaftsaemter - genauere - unteren - mittlerweile - bayerische - informationen - bundesland - sinken - schlimmer - bilanz                | 2653 | pegel bundesland aktuelle hochwasser info liegt vor mehr unter                     |

## References

- de Bruijn, J. A., de Moel, H., Jongman, B., Wagemaker, J., and Aerts, J. C. J. H.: TAGGS: Grouping Tweets to Improve Global Geoparsing for Disaster Response, *Journal of Geovisualization and Spatial Analysis*, 2, <https://doi.org/10.1007/s41651-017-0010-6>, 2017.
- de Bruijn, J. A., de Moel, H., Jongman, B., de Ruiter, M. C., Wagemaker, J., and Aerts, J. C.: A global database of historic and real-time flood events based on social media, *Scientific data*, 6, 311, 2019.
- Grootendorst, M.: BERTopic: Neural topic modeling with a class-based TF-IDF procedure, arXiv preprint arXiv:2203.05794, 2022.
- McInnes, L., Healy, J., and Astels, S.: hdbscan: Hierarchical density based clustering., *J. Open Source Softw.*, 2, 205, 2017.
- McInnes, L., Healy, J., and Melville, J.: Umap: Uniform manifold approximation and projection for dimension reduction, arXiv preprint arXiv:1802.03426, 2018.
- 70 Reimers, N. and Gurevych, I.: Sentence-BERT: Sentence Embeddings using Siamese BERT-Networks, <http://arxiv.org/abs/1908.10084>, 2019.
