# Supplementary material for: Content Analysis of Multi-Annual Time Series of Flood-Related Twitter (X) Data
Source: Copernicus journal article supplement (doi:10.5194/egusphere-2024-2556), 2024-08-30

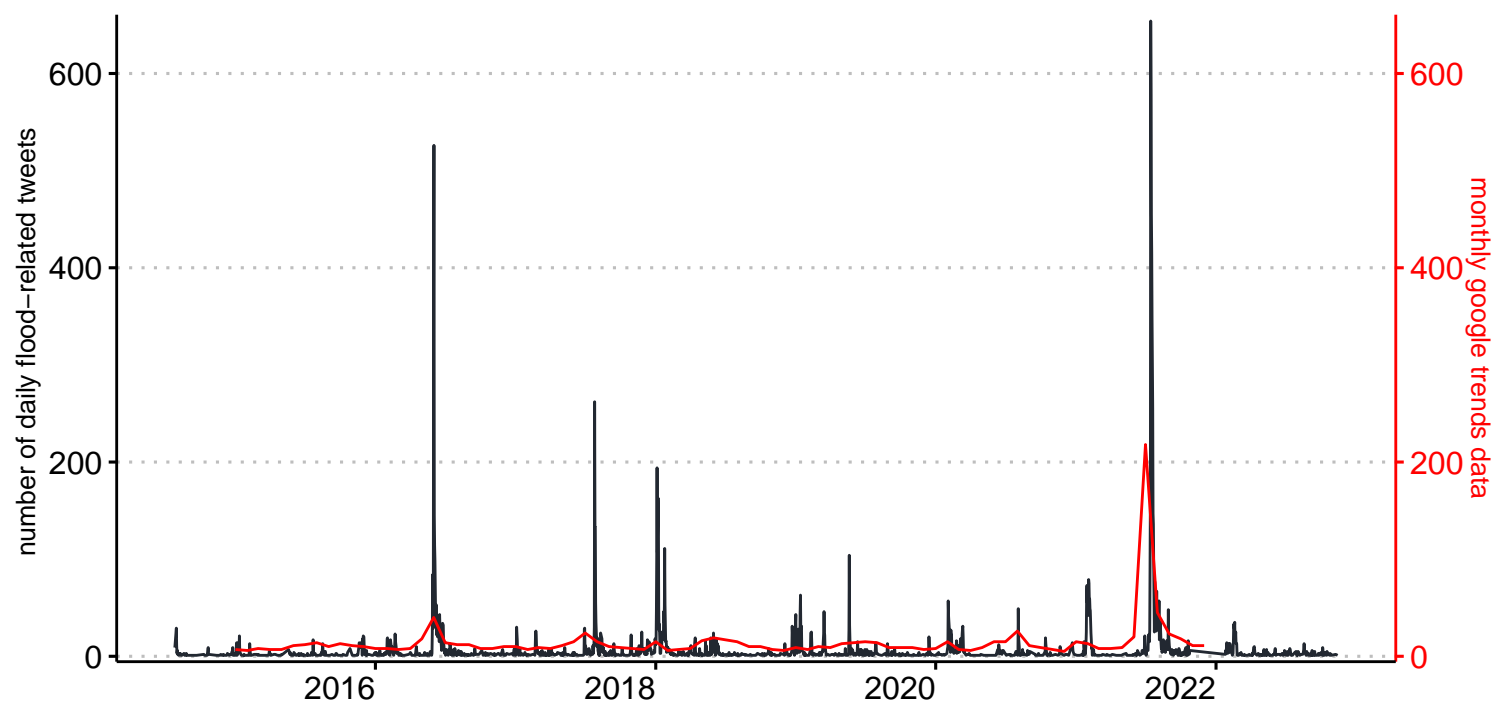

Supplement: Supplementary file [file egusphere-2024-2556-AC1-supplement.pdf]
